# Supplementary material for: Cognitive Functioning in Adolescents with Self-Reported ADHD and Depression: Results from a Population-Based Study
Source: PubMed Central journal article supplement (PMC5219031; doi:10.1007/s10802-016-0160-x), 2016-05-03

**S1. Supplementary material:** Overview of the mean age and gender distributions of participants in the TRAILS sample

[Cognitive functioning in adolescents with self-reported ADHD and depression: results from a population-based study]

**Authors:** Arunima Roy, MBBS, Albertine J. Oldehinkel, PhD, Catharina A. Hartman, PhD

Interdisciplinary Centre Psychopathology and Emotion regulation, University of Groningen, University Medical Centre Groningen, The Netherlands

**Address correspondence to:** Arunima Roy, Interdisciplinary Centre Psychopathology and Emotion regulation (ICPE), University Medical Centre Groningen, CC 72, P.O. Box 30.001, 9700 RB Groningen, the Netherlands. F + 31 50 361 9722, e-mail: [r.roy@umcg.nl](mailto:r.roy@umcg.nl)

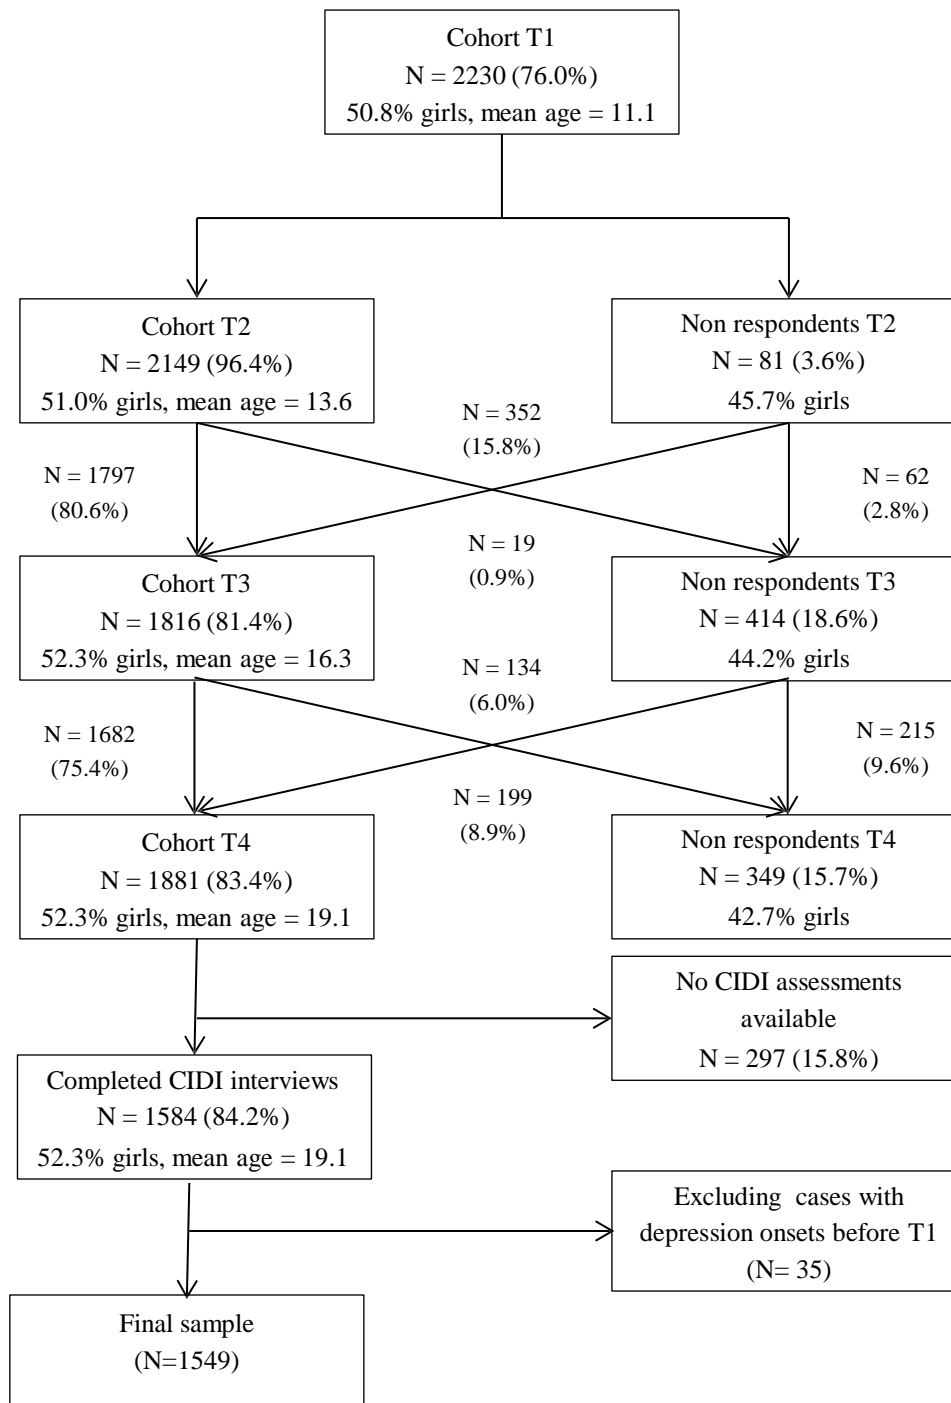

Supplement: 10802_2016_160_MOESM1_ESM.pdf [file 10802_2016_160_MOESM1_ESM.pdf]
